# Supplementary material for: People’s Experience of Shared Decision Making in Musculoskeletal Physiotherapy: A Systematic Review and Thematic Synthesis
Source: Behav Sci (Basel). 2022 Jan 12;12(1):12. doi: 10.3390/bs12010012 (PMC8773142; doi:10.3390/bs12010012)
Supplement: Supplementary file 1 [file behavsci-12-00012-s001.zip]

Archive with 8 entries (8 files):
- File S1 Search strategy audit trail.pdf
- File S2 Critical appraisal discussions.pdf
- File S3 Analysis, synthesis and refinement.pdf
- File S4 Reflexivity bio.pdf
- Table S1 Data extraction.xlsx
- Table S2 Study characteristics.pdf
- Table S3 Descriptive themes.xlsx
- Table S4 Analytical themes.xlsx
