# Supplementary material for: People’s Experience of Shared Decision Making in Musculoskeletal Physiotherapy: A Systematic Review and Thematic Synthesis
Source: Behav Sci (Basel). 2022 Jan 12;12(1):12. doi: 10.3390/bs12010012 (PMC8773142; doi:10.3390/bs12010012)
Supplement: Supplementary file 1 [file behavsci-12-00012-s001.zip › Table S1 Data extraction.xlsx]

## Sheet: Sheet3
Article	Summary methods	Summary findings	Summary conclusions/implication for review	Strengths/limitations	Robustness score
"In the physio we trust" A qualitative study on patients' preferences for physiotherapy. Berhardsson, S., Larsson, M., Johansson, K. and Ober, B. (2017) Physiotherapy theory and practice 33 (7): 535-549 DOI 10.1080/09593985.2017.1328720	20 pp purposively sampled people attending physio in Sweden, from 22-77 yrs old, various educational backgrounds and working status. Semi structured interviews, inductive exploratory approach looking at preferences for physio.	Overarching theme identified "Trust in the physiotherapist fosters active engagement in therapy" page 537. This was split into 6 categories: preferences for active treatment, preference for passive treatments, expecting professional management, wanting to participate in treatment decisions... people wanted info on risks/benefits and wanted to have their questions answered and voices heard, regard…	Treatment preferences varied. Everyone had a preference about how much they wanted to be involved in their treatment deciisons; whether a lot or a little, this seemed to increase active engagement. In terms of involvement, authors talk of a continuum, from delegators (passive) to collaborative (in the middle) to autonomists (active role), and that most in this study clustered around the middle. T…	People only talked about preferences for involvement in treatment decisions, not all decisions. The SDM part is only one small factor of the wider questions the authors asked about peoples' overall preferences for physio, and potentially a bit reductionist in labelling a cluster around the middle, without fully understanding preference for ALL decisions within physio. SDM importance shouldn't be …	COREQ 28/32
A preference for dialogue: exploring the influence of patient preferences on clinical decision making and treatment in primary care physiotherapy. (2019) Bernhardsson, S., Samsson, K., Johansson, K., Oberg, B. and Larsson, M. European Journal of Physiotherapy, 21:2, 107-114, DOI: 10.1080/21679169.2018.1496474	18 purposively sampled 22-77 year olds attending physio in sweden, various educational backgrounds and experiences with physio. Semi structured interviews via phone or face to face. Inductive exploratory approach, focussed on preferences for decision making.	Overarching theme identified "A preference for dialogue:communication essential for collaborative rehabilitation", page 109. This was split into 4 categories: my views matter, 2 way communication, leaving decisions to the physiotherapist, physiotherapy influences preferences. People wanted their voice to be heard, and felt it was essential for decision making, even when their views differed from …	Preferences: seems to portray activated patients in this piece although it doesn’t actively state this. People perceive themselves to have been involved in decisions and have had their preferences heard when the treatment reflected what they stated they wanted, but no one explicitly said the therapist had stated they were involved. People felt involved in their decisions when the treatment reflec…	2 way comms was essential for option talk, but a 'typical scenario' was after laying out options, therapist would propose what they thought was best. In the discussion, seems to have moved on slightly from the article before about SDM being more than just participating in decisions, includes sharing of info, establishing preferences and coming to a consensus. Last critique is that lots of discuss…	COREQ 27/32
A qualitative study into Egyptian patients' satisfaction with physiotherapy management of low back pain. Ali, Nancy ; May, Stephen ; Physiotherapy Research International, 2017, Vol.22 (2),	18 convience sampled people attending physio in cairo for LBP. Both national health (focus groups) and private (semi structured interviews). Deductive approach using framework anlaysis looking at people's satisfaction with the care they recieved for LBP.	5 main themes identified; outcome (people expectation pre and post physio), patient education (therapist providing info and teaching), the therapist (desired/critisized characteristics), service provision and decision making (preference for involvement). Some people's expectattions were not met and led to dissatisfaction, some people changed their expectations post physio (from cure to coping). 2…	Findings of people particiapting in their decisions is very different to other studies "do as you are told obey the expert". Overall, decision making is a small feature of the multifactoral nature of patient satisfaction with physio care in the management of LBP in Egypt.	2 different types of data collection used; focus groups for non private physio and interviews for private, and it isn't clear who says what at all times. Therefore a distinction between private and non private has been made, but not discussed. Pt activation seem low, lots of the quotes talk of passive treatments, but this theme isn’t really dsicussed, even in the patient's responsibility section …	26/32
Exercise prescription for non-specific chronic low back pain (NSCLBP): a qualitative study of patients' experiences of involvement in decision making. Stenner, Rob ; Swinkels, Annette ; Mitchell, Theresa ; Palmer, Shea ; Physiotherapy, 2016, Vol.102 (4), p.339-345	8 convenience sampled people having treatment for LBP in Biritsh NHS. Semi structured interviews, inductive theme generation.	4 main themes identified; patient's expectations and needs are not synonymous, information is necessary but not always sufficient, not all decisions need to be shared, wanting to be treated as an individual. People's expectations were based on past experiences or those of others. 2. People want info, especially about diagnosis and risk but don't always get it. 3. In this study, it seems people we…	Describes poor SDM… people wanted info but didn’t always get any/enough, there was no choice in management options, exercise was the default, patient involvement/activation is hidnered by a lack of understanding. Similar to other studies, some people opt out of decisions, likely because they trust the physio. People didn't feel listenned to (although the authors don't explicitly state this) and f…	3rd theme: not all decisions need to be shared… Should this be not all decisions want to be shared, the patient has still made a decision about opting in or out, as opposed to being deprived of the choice altogether. 4th theme is around person centred care but I don’t feel the authors go far enough to talk about understanding people or illiciting patient preference (this is the real issue here). …	16/32 Scored low on reflexivity
Patient-centredness in physiotherapy from the perspective of the chronic low back pain patient. Cooper K ; Smith BH ; Hancock E ; Physiotherapy, 2008, Vol.94 (3), p.244-25	Qualitative exploratory interviews of 25 people with chronic LBP to understand 'patient centredness'.	Found 6 main themes. Communication; was valued by participants, especially when information was represented in an accessible way (multi media and non medical terms). Individual care; people want to be listenned to, and have their care tailored to them. Decision Making; some opted out wanting the 'expert' to decide so long as the communication was good, whilst wanted more collaboration. Informatio…	Person centred care for LBP people is complex and determined by the 6 themes. Some people want to opt in to decisions, some want to opt out; authors state that preference for this should be tailored to the individual. Talk of sharing power and both clinician and patient as 'people'.	Shows a balanced view of positive and negative experiences of SDM. Need to pick out the SDM peritnent info: wanting to be listenned to, wanting to decide amount of participation in decision making, wanting to have appropriate info.	22/32, scored lower on the data collection section as methods weren't clearly described
Patient empowerment in rehabilitation: "Somebody told me to get rehabilitated" Wilkman, A. and Faltholm, Y. (2006) Advances in Physiotherapy 8 (1): 23-32	Qualitative exploratory interviews with 6 people discussing peoples empowerment and effect on rehab.	The "core category" was 'the parallel process of rehabilitation', made up of the 'traditional medical model' on one end of the spectrum which was mostly secondary care hospital patients, and the 'individual model' on the other end from primary care. The traditional medical model includes compliance (decisions defered to the 'expert' clinicians, elements of trust here), subordinance (happy to foll…	Splits experiences into two extremes: 1 is the traditional model, generally negative, but some were happy to delegate decisions due to trusting in the clincian, and this was geenrally during hospital stays. Also led to disempowerment and confusion at times. 2, the individual model valued being listenned to, daring to demand a choice and being able to self manage.	Mixes peoples' experiences with caridology, orthopaedics and neurology. Authors' language changes from 'physicians' in the traditional medical model section, to 'caregivers' in the individual model.	17/32, scored low on reflexivity and data collection
The physiotherapy experience in private practice: The patients' perspective. Potter M ; Gordon S ; Hamer P ; Australian Journal of Physiotherapy, 2003, Vol.49 (3), p.195-203	Nominal group technique used with 26 participants who had private physio; discussing person centred care.	Main findings split into two broad headings: the 'qualties of a good physiotherapist' and the 'physiotherapy experience'. People felt traits of a good phsyio included good communication skills (having good interpersonal skills, having a caringd friendly manner, and good teaching/education skills). Good physio experiences centred around being listenned to and getting better, whilst bad was not fee…	From and SDM point of view, some of the bad experiences stemmed from a lack of pwer sharing. Although not explicitly talking about participation in decision making, people did say that therapists didn’t listen to what they had to say in terms of their condition or rehabilitation. Parts of SDM then could be linked to satisfaction	Very small amount of data around shared decision making/partient participation as an approach to healthcare.	19/32, scored low on interviewer characteristics and reflexivity
Physical therapy patients' perceptions of their relationships with health care professionals. Payton OD ; Nelson CE ; St. Clair Hobbs M ; Physiotherapy Theory & Practice, 1998, Vol.14 (4), p.211-222	Semi structured interviews of 109 people who had undergone physiotherapy were performed, with a focus on their perceptions of their role and relationship with the therapist, within decision making.	Percentages split into what did you perceive the therapists role was? perception of their own role? Perception of change in relationship. And perception of power in the relationship. 95% of people said their therapist decided treatment (although conversely, only 23% said they had no involvement in decisions, suggesting there may have been some collaboration in decision making) but this isn't disc…	People had little expectations going into therapy, but some became empowered during sessions; this suggests experience, knowledge and information provision could have a role in empowerment and the ability to participate. Overall, most epople wanted more involvement, and comments revolved around clinicians being more approachable. One question around people's views of power spread was, "should the…	In the interviews, the discussion on sharing of power went further than just client/physio, but included people's thoughts on their relationships with physicians. The interview data has been reduced to quantiative data on common themes, and no deeper exploration or understanding has been presented in the results.	12/32, poor methods reporting, poor reflexivity
Importance of a patient-centred approach in ensuring quality of post-fracture rehabilitation for working aged people: A qualitative study of therapists' and patients' perspectives. Lindahl, Marianne ; Teljigović, Sanel ; Jensen, Lars Heegaard ; Hvalsoe, Berit ; Juneja, Hemant ; Work, 2016, Vol.55 (4), p.831-840	Semi structured interviews and focus groups of both therapists and patients, focussed on patient centredness of rehabilitation (both in and out patients) following a fracture. For the focus of this paper I will focus on the patients' views only.	The core category was 'partnership'. Minor themes included 1. The biospycosocial approach; people appreciated interest shown in their wider life but valued the therapists's opinions on return to wider life and job activited to varying degrees. 2 Professionalism; professionalism was integral for building interpersonal relationships between therapist and patient. People felt empowered if they perci…	People want involvement in their care, and feel empowered if they are listenned to. Information needs to be understandable.	The therapist and patient views are sometimes presented together, making it hard to focus solely on the patients' persepctives. The therapists included also included non-physiotherapists.	25/32
