# Supplementary material for: People’s Experience of Shared Decision Making in Musculoskeletal Physiotherapy: A Systematic Review and Thematic Synthesis
Source: Behav Sci (Basel). 2022 Jan 12;12(1):12. doi: 10.3390/bs12010012 (PMC8773142; doi:10.3390/bs12010012)
Supplement: Supplementary file 1 [file behavsci-12-00012-s001.zip › Table S3 Descriptive themes.xlsx]

## Sheet: Sheet1
TRUST	TRUST	TREATMENT PREFERENCES	TREATMENT PREFERENCES	TREATMENT PREFERNCES	DECISION PREFERENCES	DECISION PREFERENCES	DECISION PREFERENCES	DECISION ABILITY	DECISION ABILITY	COMMUNICATION	COMMUNICATION	COMMUNICATION	BENEFITS OF SDM
People trust physiotherapists, and this has implications on decision making	Trust can hamper people's involvement in decision making	People's preferences for treatments vary, but preferences should influence treatment decisions	People want treatments to be based on evidence	People want treatments to be tailored and make sense	People's preferences for decision making varies	People want to be involved in decision making	People don’t want to be involved in decision making	People aren't involved in decision making	The power struggle	People want information	People want to be listened to	2 way communication is essential for collaboration, and for SDM	More involvement in decision making can have an impact on outcome	Key
1: trust in the physio stimulated people's engagement, regardless of their preferences for decision making	1: Trust in the expert may actually hamper people's ability to participate in decision making	1: Some people prefer active approaches, some more passive, some want a combination. Preferences were based on people's perception of physio, people's perception of what might make them better and people's past experiences. Active approaches were thought to help prevent further pain, and help the person self manage.	1: scepticism towards alternative therapies exist, and people want treatment to be based on science.	5. when treatments were fully explained, people felt treatment was tailored to them	1: Some want to be involved, others were happy to defer to decision back to the physio because they trusted them. Even those that didn’t want to choose the actual treatment, still wanted to be involved in decision making. Fits with Chewning's delegators, collaborators and autonomists. This study showed most people were in the middle, but a few could be places either side	1: It's important for people to influence the treatment decision so the treatment is tailored to their needs	1: People were happy to delegate decision because they trusted the physio who knew what was best, but still wanted their opinions heard. It is their job to do what the therapist says.	2: A typical scenario was the physio laying out treatment options, and then proffering the one they thought best. People did not seem dissatisfied with this, but this isn't overtly discussed.	2: having experience of physio, and finding out what works for the person and what doesn't, helped empower people. Positive experiences improved confidence in self management for the future. Without this knowledge and experience, would they have know/acted like this?	1: People wanted information for a diagnosis, but also on how to manage their condition. Information is empowerment.	1: Decisions shouldn't be made without the person being listened to. Their preferences should be heard	2. expressing their story and opinion allowed people's preferences to be taken into account for decisions.	8. someone felt if they had more input, they would have worked a lot harder	1. Berhardsson et al 2017
1: people had trust in the physio's ability to choose and guide therapy	2: people accepted physio's decisions as the expert in the relationship, especially if they weren't sure on their own treatment preferences	2: people felt their preferences influenced treatment decisions,	7. The physio keeping up to date with knowledge and skills was an important trait that people valued	5. If treatments weren't fully explained they didn't make sense to the person.	2: people think they've shared the decision if they agree with the physio's choice	2: People wanted to be involved in their treatment decision, and also decisions further down the line during rehab	2: People were happy with physios making the decision for them	2: some people did not have any option talk, and had no control over the treatment provided	2: Knowing more about treatment options was empowering, and led people to believe they could make decisions on their own.	2: People valued information on treatment options	2: People felt it was integral to have their views heard, even if they were divergent from the physios'. They wanted their preferences heard	2: asking questions and getting answers from the physio was positive, and helped people make decisions		2. Berhardsson et al 2019
1: people had confidence in the competence and skills of the physio	3: People trusted the physio to make the right decision for them and to take care of them	2: people were disappointed when their preferences were not accommodated		5. If exercises were prescribed without understanding the persons practical restrictions e.g.. Work, they were less likely to be done.	2: some people were passive with sharing decisions	5. People wanted a choice of alternative treatment options when their treatment wasn't felt to be helpful.	3. Most participants wanted to delegate decisions to the expert, to avoid making the wrong decision. In the discussion, the authors suggest that those who seek healthcare intervention are those that favour an external locus of control (delegate control to professional)	4. people weren't given any choice over their treatment, exercise prescription was the default	3. Having information about diagnosis, prognosis and treatment allows people to have a role in self management	2: good communication from the physio improved the consultation	2: People felt their feedback on how treatment was going was integral to help the physio	2: 2 way communication allowed for collaboration		3 Ali and May 2015
2: people trust physio's who listen to them and take their stories seriously.	4. trust was cited as a reason to defer a decision to the physio	4: peoples expectation of physio was to be given exercises, but this did not necessarily match their preferences.			2: Extent of desire to participate in decisions varied, but nearly all participants wanted some kind of involvement	5. People want to know all of their treatment options	4. people are happy to defer 'minor' decisions such as exercise prescription to a physio	4. people were told what to do, this led to confusion and frustration, one participant cried	4. People reported if they had been more informed or had more confidence, they could have challenged the physio when they were prescribed exercise without being offered a treatment choice	2: Knowing more about treatment options was empowering, knowing more led to informed decisions	2: feeling listened to and taken seriously was integral to developing rapport and trust	5. People on the whole are satisfied with the communication they experience within physio		4. Stenner et al 2016
3: people valued perceived personal competence, empathy, ability to listen, being 'clever' in the physiotherapist. If the physio has passion this can foster trust.	5. trust was cited as a reason for someone to defer a decision to the physio	4. peoples preferences weren't necessarily taken into account. They felt the treatment was generic and not tailored, and this led to frustration			4. Preference for decision making varied, and it also varied dependent on the type of decision being made; e.g.. Happy to defer minor decisions	6. people thought their preferences should have been taken into account	4. People felt it was the physio's role to look after the patient and make a decision in their best interest	5. if treatments were prescribed that opposed the person's preferences, this affected compliance.	4. People didn't know how to help themselves	3. People want info on diagnosis, prognosis and treatment so that they can help themselves… knowledge is power. Information provisions helps people to self manage	5. involving the person, listening, understanding and getting to know them resulted in good communication	5. People who felt they were unable to communicate did not feel involved in physiotherapy		5. Cooper et al 2008
5. People where happy to defer decisions to the 'expert' physiotherapist.	6. trust occurred because the health professional was deemed an expert	5. When people's preferences for type and dose of exercises weren't taken into account, it affected compliance negatively.			5. Preference per participant varied	8. Almost half of people said it was there decision as to whether to participate in therapy	5. people were happy to defer decisions to the 'expert' physio, so long as explanations were good	5. people weren't asked their preferences, and resulted in a negative experience	5. People want information in non-medical terms, if they understand in layman's terms it improves knowledge and understanding. Technical jargon leaves people with no extra understanding	4. People want to understand their diagnosis and prognosis, and they want their fears allayed, but the information provided isn’t always sufficient	5. when a lack of listening and understanding occurred, it leads to frustration.	5. Clinicians encouraging the person to be involved in resulting in good communication.		6. Wikman et al 2006
5. Physiotherapists were seen as back specialists and this perceived competency fostered trust	8. 'The therapist knows best'.	6. People hadn’t reflected on their involvement in decision making until the study			8. most people felt the process of decision making should stay the same, whether they felt they were involved or not	8. 68% wanted more involvement in setting goals, 47% wanted more involvement in deciding treatment	5. Some come to physiotherapy to listen and be told what to do by the 'professional'	5. People weren't aware of all of the treatment options, and were unaware of treatments that other people had undergone (lack of equity)	7. Being able to ask questions as I regained my ability to do more, associated with positive physio experience	5. People want information about treatment options, they infer that having more information can make the treatment received 'better'.	5. one to one physio enabled the person to be listened to whereas group intervention left people feeling misunderstood	5. feedback from the person during treatment can result in adaptations that can be made to better suit the person.		7. Potter et al., 2003
6. People trusted the expert clinician to make the right decision	8. 'know it all' attitudes from physicians blocked people's ability to collaborate	7. Some want information on self help strategies, some want hands on treatment			8. preferences for being involved varied dependent on the decision being made (e.g. different for goal setting and deciding treatment)	8.' Collaboration is important in my life'	8. Just over half felt it was not their decision as to whether they participated in therapy	6. Decisions were made by the healthcare professional in the in patient setting without any consultation with the person	8. 25% felt they wouldn’t know how to participate more in decision making	5. People want information in non medical terms	7. Traits of a 'good' physio is when they can demonstrate empathy and respect for the person	5. 2 way communication between patients (during group based intervention) is helpful		8. Payton et al., 1998
8. some people felt their relationship changed over time with either becoming friends, having increased trust, or increased respect. This made fear go away	9. Perceived competence in the physiotherapist's knowledge and abilities improved a persons' confidence	9. There was value seen in hands on treatment approaches to improve objective markers but also a persons' confidence.			8. the same participant said they wanted more involvement in decision making as she is the boss and the therapist the guide, and then said they felt the therapist should dictate treatment as they should know what's best	8. Someone said if they were allowed to make all of their healthcare decisions, they would have	8. 21% felt the therapist would tell them what to do, 'they should know what is important for me'	7. Therapists deciding treatment for people that were opposing to their beliefs were associated with a bad physiotherapy experience	8. People said they would have liked to be 'involved in decisions within their ability'	5. Information should be tailored to the individual	8. 80% of people gave feedback/information	7. When people aren’t listened to re: increased pain with rehab programme, it is associated with a bad experience of physio		9. Lindahl et al., 2016
8. 'The therapist knows best'					8. Cultural, social and economic factors may influence preference for decision making	9. when the therapist took the person's preferences into account, it gave them a sense of control	8. less educated group more likely to defer decisions	7. some physio's exerted 'power' over the relationship with was associated with a negative physio experience		5. People want information on their diagnosis and prognosis, and it should be in understandable layman's terms	8. People felt that in order for a therapist to create a goal, they needed to understand the persons' background and activity levels	7. Good communication was cited as the most important factor for people's satisfaction with physio
8. 'Decisions should be mutual and based on trust'								8. 23% of people said they weren't involved in any decision making		6. when things aren’t fully explained in a way a person can understand, this can lead to misunderstanding	8. when not listened to, people were frustrated	7. Authors advise communication training to encourage patient centred approach
								8. 94% of people said the therapist decided treatment		7. Sharing information at an appropriate level is a trait of a 'good' physio, not sharing appropriate explanations is associated with a bad experience		8. people don’t want to be told what to do, they want advice and then be able to make their own decisions
								8. Less than half of people felt they made decisions collaboratively with a healthcare professional		7. Giving clear information on what to do and what not to do is important
								8. less educated group less likely to be involved in decision making, more likely to be passive		7. People want a diagnosis.
										9. people wanted information provided in a friendly, non judgemental manner that was easy to understand
