# Supplementary material for: People’s Experience of Shared Decision Making in Musculoskeletal Physiotherapy: A Systematic Review and Thematic Synthesis
Source: Behav Sci (Basel). 2022 Jan 12;12(1):12. doi: 10.3390/bs12010012 (PMC8773142; doi:10.3390/bs12010012)
Supplement: Supplementary file 1 [file behavsci-12-00012-s001.zip › Table S4 Analytical themes.xlsx]

## Sheet: Sheet1
TRUST	TRUST	TREATMENT PREFERENCES	TREATMENT PREFERENCES	TREATMENT PREFERENCES	DECISION PREFERENCES	DECISION PREFERENCES	DECISION PREFERENCES	DECISION ABILITY	DECISION ABILITY	COMMUNICATION	COMMUNICATION	COMMUNICATION	BENEFITS OF SDM
People trust physiotherapists, and this has implications on decision making	Trust can hamper people's involvement in decision making	People's preferences for treatments vary, but preferences should influence treatment decisions	People want treatments to be based on evidence	People want treatments to be tailored and make sense	People's preferences for decision making varies	People want to be involved in decision making	People don’t want to be involved in decision making	People aren't involved in decision making	The power struggle	People want information	People want to be listened to	2 way communication is essential for collaboration, and for SDM	More involvement in decision making can have an impact on outcome	Key	Red text demonstartes synthesis, blue text is the questions the authors asked themselves during stages 4 and 5
1: trust in the physio stimulated people's engagement, regardless of their preferences for decision making	1: Trust in the expert may actually hamper people's ability to participate in decision making	1: Some people prefer active approaches, some more passive, some want a combination. Preferences were based on people's perception of physio, people's perception of what might make them better and people's past experiences. Active approaches were thought to help prevent further pain, and help the person self manage.	1: scepticism towards alternative therapies exist, and people want treatment to be based on science.	5. when treatments were fully explained, people felt treatment was tailored to them	1: Some want to be involved, others were happy to defer to decision back to the physio because they trusted them. Even those that didn’t want to choose the actual treatment, still wanted to be involved in decision making. This study showed most people were in the middle, but a few could be places either side	1: It's important for people to influence the treatment decision so the treatment is tailored to their needs	1: People were happy to delegate decision because they trusted the physio who knew what was best, but still wanted their opinions heard. It is their job to do what the therapist says.	2: A typical scenario was the physio laying out treatment options, and then proffering the one they thought best. People did not seem dissatisfied with this, but this isn't overtly discussed.	2: having experience of physio, and finding out what works for the person and what doesn't, helped empower people. Positive experiences improved confidence in self management for the future. Without this knowledge and experience, would they have know/acted like this?	1: People wanted information for a diagnosis, but also on how to manage their condition. Information is empowerment.	1: Decisions shouldn't be made without the person being listened to. Their preferences should be heard	2. expressing their story and opinion allowed people's preferences to be taken into account for decisions.	8. someone felt if they had more input, they would have worked a lot harder	1. Berhardsson et al 2017
1: people had trust in the physio's ability to choose and guide therapy	2: people accepted physio's decisions as the expert in the relationship, especially if they weren't sure on their own treatment preferences	2: people felt their preferences influenced treatment decisions,	7. The physio keeping up to date with knowledge and skills was an important trait that people valued	5. If treatments weren't fully explained they didn't make sense to the person.	2: people think they've shared the decision if they agree with the physio's choice	2: People wanted to be involved in their treatment decision, and also decisions further down the line during rehab	2: People were happy with physios making the decision for them	2: some people did not have any option talk, and had no control over the treatment provided	2: Knowing more about treatment options was empowering, and led people to believe they could make decisions on their own.	2: People valued information on treatment options	2: People felt it was integral to have their views heard, even if they were divergent from the physios'. They wanted their preferences heard	2: asking questions and getting answers from the physio was positive, and helped people make decisions		2. Berhardsson et al 2019
1: people had confidence in the competence and skills of the physio	3: People trusted the physio to make the right decision for them and to take care of them	2: people were disappointed when their preferences were not accommodated		5. If exercises were prescribed without understanding the persons practical restrictions eg. Work, they were less likely to be done.	2: some people were passive with sharing decisions	5. People wanted a choice of alternative treatment options when their treatment wasn't felt to be helpful.	3. Most participants wanted to delegate decisions to the expert, to avoid making the wrong decision. In the discussion, the authors suggest that those who seek healthcare intervention are those that favour an external locus of control (delegate control to professional)	4. people weren't given any choice over their treatment, exercise prescription was the default	3. Having information about diagnosis, prognosis and treatment allows people to have a role in self management	2: good communication from the physio improved the consultation	2: People felt their feedback on how treatment was going was integral to help the physio	2: 2 way communication allowed for collaboration		3 Ali and May 2015
2: people trust physio's who listen to them and take their stories seriously.	4. trust was cited as a reason to defer a decision to the physio	4: peoples expectation of physio was to be given exercises, but this did not necessarily match their preferences.			2: Extent of desire to participate in decisions varied, but nearly all participants wanted some kind of involvement	5. People want to know all of their treatment options … is this knowledge?	4. people are happy to defer 'minor' decisions such as exercise prescription to a physio	4. people were told what to do, this led to confusion and frustration, one participant cried	4. People reported if they had been more informed or had more confidence, they could have challenged the physio when they were prescribed exercise without being offered a treatment choice	2: Knowing more about treatment options was empowering, knowing more led to informed decisions	2: feeling listened to and taken seriously was integral to developing rapport and trust	5. People on the whole are satisfied with the communication they experience within physio		4. Stenner et al 2016
3: people valued perceived personal competence, empathy, ability to listen, being 'clever' in the physiotherapist. If the physio has passion this can foster trust.	5. trust was cited as a reason for someone to defer a decision to the physio	4. peoples preferences weren't necessarily taken into account. They felt the treatment was generic and not tailored, and this led to frustration			4. Preference for decision making varied, and it also varied dependent on the type of decision being made; eg. Happy to defer minor decisions	6. people thought their preferences should have been taken into account	4. People felt it was the physio's role to look after the patient and make a decision in their best interest	5. if treatments were prescribed that opposed the person's preferences, this affected compliance.	4. People didn't know how to help themselves	3. People want info on diagnosis, prognosis and treatment so that they can help themselves… knowledge is power. Information provisions helps people to self manage	5. involving the person, listening, understanding and getting to know them resulted in good communication	5. People who felt they were unable to communicate did not feel involved in physiotherapy		5. Cooper et al 2008
5. People were happy to defer decisions to the 'expert' physiotherapist.	6. trust occurred because the health professional was deemed an expert	5. When people's preferences for type and dose of exercises weren't taken into account, it affected compliance negatively.			5. Preference per participant varied	8. Almost half of people said it was there decision as to whether to participate in therapy	5. people were happy to defer decisions to the 'expert' physio, so long as explanations were good	5. people weren't asked their preferences, and resulted in a negative experience	5. People want information in non-medical terms, if they understand in layman's terms it improves knowledge and understanding. Technical jargon leaves people with no extra understanding	4. People want to understand their diagnosis and prognosis, and they want their fears allayed, but the information provided isn’t always sufficient	5. when a lack of listening and understanding occurred, it leads to frustration.	5. Clinicians encouraging the person to be involved in resulting in good communication.		6. Wikman and Faltholm 2006
5. Physiotherapists were seen as back specialists and this perceived competency fostered trust	8. 'The therapist knows best'.	6. People hadn’t reflected on their involvement in decision making until the study			8. most people felt the process of decision making should stay the same, whether they felt they were involved or not	8. 68% wanted more involvement in setting goals, 47% wanted more involvement in deciding treatment	5. Some come to physiotherapy to listen and be told what to do by the 'professional'	5. People weren't aware of all of the treatment options, and were unaware of treatments that other people had undergone (lack of equity)	7. Being able to ask questions as I regained my ability to do more, associated with positive physio experience	5. People want information about treatment options, they infer that having more information can make the treatment received 'better'.	5. one to one physio enabled the person to be listened to whereas group intervention left people feeling misunderstood	5. feedback from the person during treatment can result in adaptations that can be made to better suit the person.		7. Potter et al., 2003
6. People trusted the expert clinician to make the right decision	8. 'know it all' attitudes from physicians blocked people's ability to collaborate	7. Some want information on self help strategies, some want hands on treatment			8. preferences for being involved varied dependent on the decision being made (eg different for goal setting and deciding treatment)	8.' Collaboration is important in my life'	8. Just over half felt it was not their decision as to whether they participated in therapy	6. Decisions were made by the healthcare professional in the in patient setting without any consultation with the person	8. 25% felt they wouldn’t know how to participate more in decision making	5. People want information in non medical terms	7. Traits of a 'good' physio is when they can demonstrate empathy and respect for the person	5. 2 way communication between patients (during group based intervention) is helpful		8. Payton et al., 1998
8. some people felt their relationship changed over time with either becoming friends, having increased trust, or increased respect. This made fear go away		9. There was value seen in hands on treatment approaches to improve objective markers but also a persons' confidence.			8. the same participant said they wanted more involvement in decision making as she is the boss and the therapist the guide, and then said they felt the therapist should dictate treatment as they should know what's best	8. Someone said if they were allowed to make all of their healthcare decisions, they would have	8. 21% felt the therapist would tell them what to do, 'they should know what is important for me'	7. Therapists deciding treatment for people that were opposing to their beliefs were associated with a bad physiotherapy experience	8. People said they would have liked to be 'involved in decisions within their ability'	5. Information should be tailored to the individual	8. 80% of people gave feedback/information	7. When people aren’t listened to re: increased pain with rehab programme, it is associated with a bad experience of physio		9. Lindahl et al., 2016
8. 'The therapist knows best'					8. Cultural, social and economic factors may influence preference for decision making	9. when the therapist took the person's preferences into acount, it gave them a sense of control	8. less educated group more likely to defer decisions	7. some physio's exerted 'power' over the relationship with was associated with a negative physio experience		5. People want information on their diagnosis and prognosis, and it should be in understandable layman's terms	8. People felt that in order for a therapist to create a goal, they needed to understand the persons' background and activity levels	7. Good communication was cited as the most important factor for people's satisfaction with physio
8. 'Decisions should be mutual and based on trust'								8. 23% of people said they weren't involved in any decision making		6. when things aren’t fully explained in a way a person can understand, this can lead to misunderstanding	8. when not listened to, people were frustrated	7. Authors advise communication training to encourage patient centred approach
9. Percieved competence in the physiotherapists's knowledge and abilities improved a persons' confidence								8. 94% of people said the therapist decided treatment		7. Sharing information at an appropriate level is a trait of a 'good' physio, not sharing appropriate explanations is associated with a bad experience	9. Someone wanted to be listenned to, and it made sense when the physio ased probing questions	8. people don’t want to be told what to do, they want advice and then be able to make their own decisions
The 'therapist knows best' (8). People were happy to defer decisions to the 'expert' clinician (1,5,) and were happy they would make the 'right' decision (1. 6) Something about fear of making the 'wrong decision' if person was completely autonomous	Trust in the expert was cited as a reason for someone to defer a decision, and therefore defer their own involvement (1, 2, 3, 4, 5, 8)	Peoples' preferences for treatments vary (1,5, 7) ; some want active strategies, some want passive treatment (1) . This is based on their own experience (social learning theories)	Some people felt treatment should be evidence based, and that if the physio kept up to date with their own knowledge, this could translate into good decision making for treatment choices (1,7)	People want treatments to be individualised and tailored (5)	Preference for how much the person was involved in a decision varied (1, 2, 4, 5, 8), some people were passive, some were more active, and lots were in the middle (1,8) Fits with Chewnings model of delegators, collaborators and autonomists.	People want to be involved in decision making throughout the process(1,2, 3, 8), including goal setting and treatment choice (8)	People were happy to defer decisions to the expert (1, 2, 3, 4, 5).	8. Less than half of people felt they made decisions collaboratively with a healthcare professional	Previous experience of physio helped people to understand what worked for them and left them empowered (1)	7. Giving clear information on what to do and what not to do is important	People felt it was integral to be listened to and have their preferences heard (1, 2, 8) even if their preference was divergent to the physio (1), and decisions shouldn’t be made without being listened to (1)	A person able to communicate their story and preferences enabled collaboration (2, 5, 8)
Trust was fostered by perceived personal competence, communication skills and empathic personality traits (1, 2, 3, 5, 9)	People felt the expert would choose what was best (2, 3, 8), especially if the person wasn't sure on their own preferences (2).	People felt their preferences for treatment should be taken into account (1); when they weren't this was negative and even resulted in reduced 'compliance' with a programme. Not understanding peoples' preferences led to perception of generic treatments, therefore treatment should be tailored to improve satisfaction (2, 4, 5)		Tailored treatment was perceived to happen when good communication around the explanation occured (5) The inference here then is if clinicians do this, people will feel their Rx is individualised, makes more sense and more likely to have +ve experience	Preference for how much involvement they had could vary based on each decision, and this could be due to the perceived level of risk the decision could bring (4,8)	People wanted their preferences to be taken into account (6,8) and they want choices (5). When this happens, they fel they have gained control (9)	People felt it was the physios' role to make the decision in the best interest of the person, and the person's role to listen to them (1, 3, 5, 8)	8. someone felt if they had more input, they would have worked a lot harder	more knowledge resulted in a greater ability to participate in DM or even to self manage (2, 3, 4, 5), and knowledge could be gained from information provision from the therapist (2), but only if it was presented in non medical terms (5). This is close to the 'people want information' but has bigger implications as to why they want info, to enable them. Lack of knowledge left people unable to cha…	7. People want a diagnosis.	This not only led to a more positive experience (2, 5, 7, 9) and the ability to develop trust (2), but people felt that part of their role as the patient was to help the physio create goals and treatment based on the feedback and information they provided (1, 2, 8)	Being listened to enabled people to participate in DM (2) and scenarios that actively encouraged questions and feedback further facilitated this (2, 5).
Trust resulted in a positive experience, and could be mutual (8), even so far as increasing engagement (1), and reducing fear (8, 9).	Trust could be fostered solely because the physio was deemed an 'expert' (2, 3, 6)	There can be mismatch in people's expectations for treatment and what they are given (4)		If exercises were prescribed which didn't take into account someone's' preferences, they were less likely to be done (5). Could this fit with the -ve impact of when preferences aren't taken into account? (one half of column C)	People wanted to be involved, even if they didn’t make the actual decision (1, 2)	Some people are very empowered to collaborate and make decisions (1, Someone said if they could have made all the decisions they would have (8), infers some outside entity blocking their ability to make decisions. Could this fit with 'people aren't involved in decision making too?	People were happy to defer because the physio was the expert who knows what is best, and knows the persons' preferences (1, 3, 4, 5) because of fear of making the wrong decision (3,4), if the explanation was good (5), if the decision was 'minor' (4) if they did not think it was their role to make decisions (4,5,8)	8. less educated group less likely to be involved in decision making, more likely to be passive	more confidence; positive previous experience led to increased self confidence (2), whereas lack of confidence led people to feel they couldn't challenge the physio when they wanted more involvement (4)	9. people wanted information provided in a friendly, non judgemental manner that was easy to understand	Feeling listened to, or a physio demonstrating empathy, resulted in greater satisfaction and trust (2, 5,7) and not being listened to resulted in frustration (5,8)	2 way communication between people/patients is helpful in group based intervention (5)
	This perceived 'expertise' was not always welcomed, and a lack of understanding of the persons' preferences/values led to the physio blocking the person's ability to participate (8)				In terms of satisfaction with involvement, whether they were involved or not, some people felt they wouldn't want DM to change, whilst others showed ambiguity with their involvement. Shows collaboration with DM is complex (8)	Influencing the decision made people feel treatment was tailored to their needs (1) could this have overlap with treatment preferences should be taken into account	Less educated group less likely to be involved (8)… this isn't clear if it is a preference or not so could be moved over to next column as the inference here is ? Capacity related	Physio laid out options, and then proffered the one they thought best. This means the person isn’t involved equally in the DM. (1)	The ability to ask questions and challenge could come from previous experience (2,7) knowledge (2, 3)and confidence (4). People felt they would like to have been involved in decisions within their abilities (8).	People want information on diagnosis, prognosis, treatment options and self management strategies (1,2,3, 4, 5, 7, 9)	1:1 physio resulted in people felling that their preferences were heard more than group based intervention	Collaborative communication is integral for a good experience and a person's satisfaction (7), poor, didactic communication leads to a negative experience (7, 8)
		There is scope to split this column into A & B, +ves when preferences are taken into account, -ve when not			Statistical analysis showed factors which might influence DM preferences were cultural, social and economical ones (8); only limited understanding of this due to reductionist stats, but could be a starting point for future research			Physio chose the treatment independently of the person (2, 4, 6, 8)		Being offered information can lead to a more positive experience (2,5, 7) , the ability to have fears allayed (4) and empowerment to make informed decisions (2, 3)
								There were no treatment options laid out (2.5), or not all of the options were laid out which could lead to inequity (5)		Information should be presented in a way people can understand (9), if it isn’t this can lead to a negative experience (3, 5, 6, 7) . Information available isn't always sufficient (4)
								The physio did not take into account the persons' preferences for treatment decision, and this led to a negative experience (in some cases an emotionally) and could affect compliance (5,7, 8)
								Physios exerted 'power' over the relationship (7), people were told what to do (4), and if this opposed the person's beliefs, could impact the physio experience negatively (7, 5, 4). This could lead to disempowerment
